# Supplementary material for: Dissemination of antibiotic resistance genes associated with the sporobiota in sediments impacted by wastewater
Source: PeerJ journal article supplement (doi:10.7717/peerj.4989), 2018-06-20
Supplement: Supplementary_Figure_2.pdf [file Supplementary_Figure_2.pdf]

### A. *tet(W)*

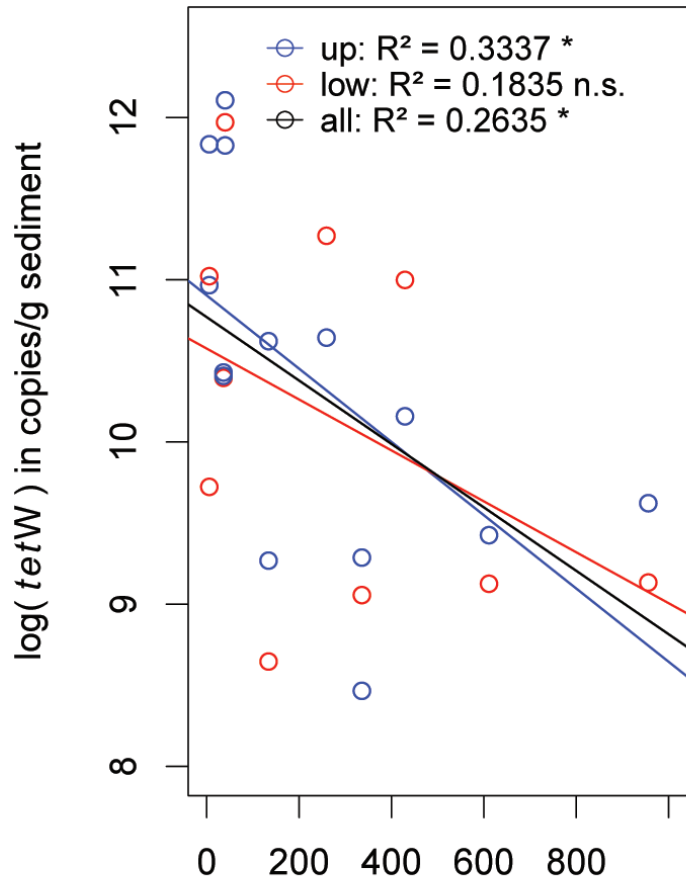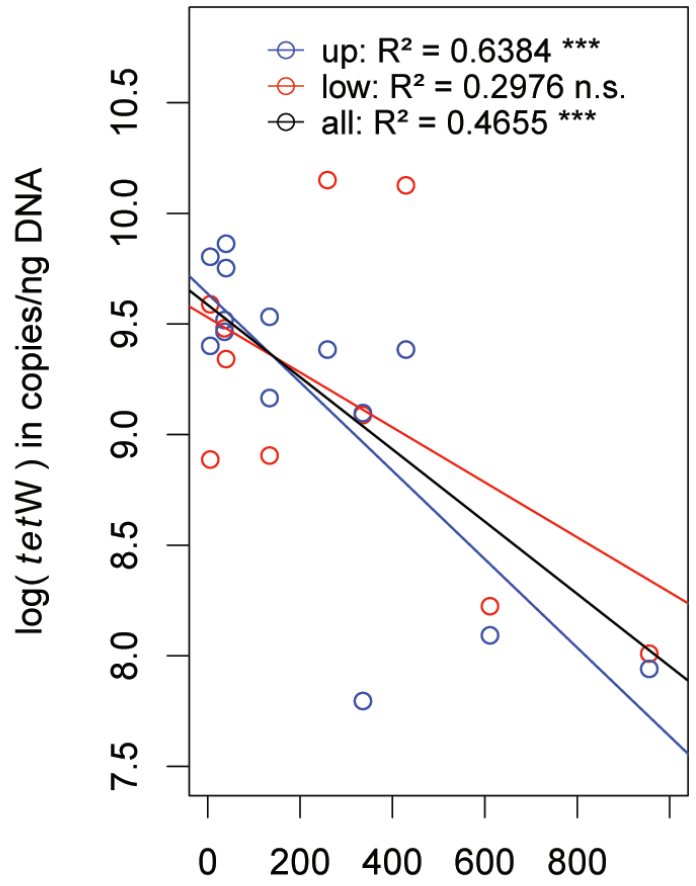

### B. *sul1*

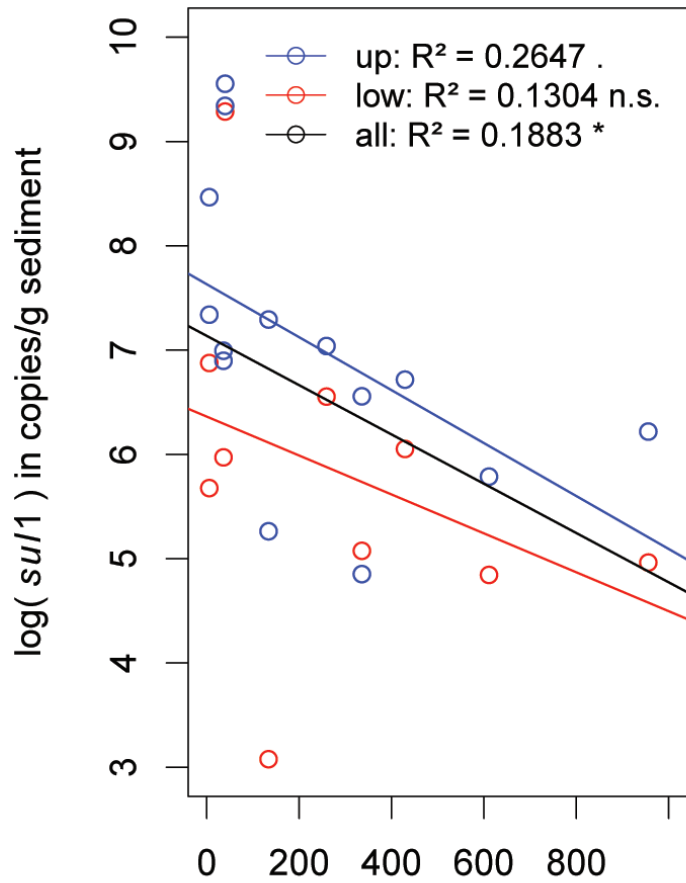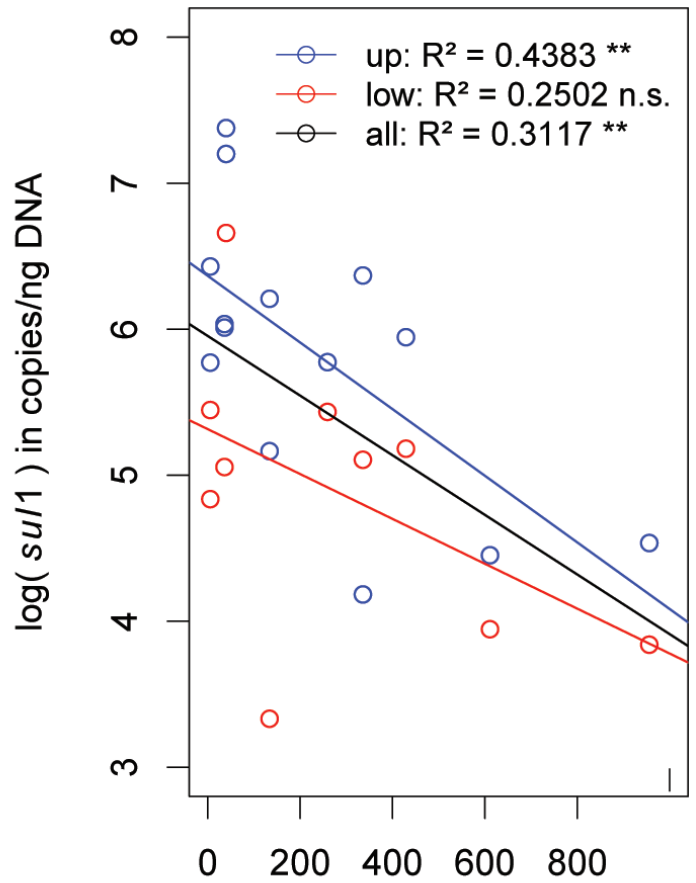

Distance to the pipe - all directions (m)
