# Supplementary material for: Dissemination of antibiotic resistance genes associated with the sporobiota in sediments impacted by wastewater
Source: PeerJ journal article supplement (doi:10.7717/peerj.4989), 2018-06-20

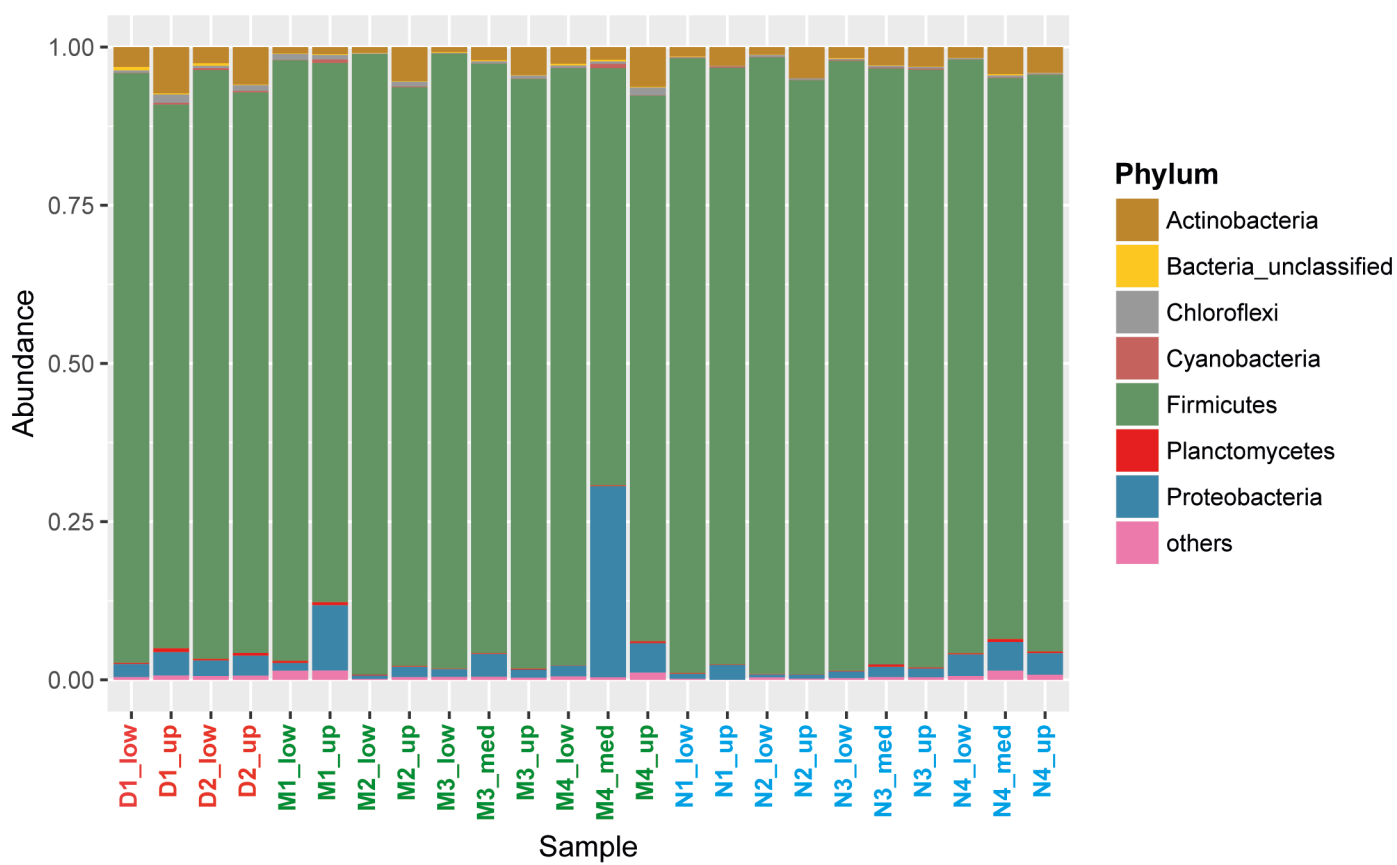

Supplement: Supplementary_Figure_4.pdf [file Supplementary_Figure_4.pdf]
